## Eyes wide open: regulation of arousal by temporal expectations

Nir Shalev<sup>1,2</sup>, Anna C. Nobre<sup>1,2</sup>

<sup>1</sup>*Department of Experimental Psychology, University of Oxford, UK*

<sup>2</sup>*Oxford Centre for Human Brain Activity, Wellcome Centre for Integrative Neuroimaging, Department of Psychiatry, University of Oxford, UK*

### Corresponding author contact information:

Nir Shalev

University of Oxford

Department of Experimental Psychology

Radcliffe Observatory, Anna Watts Building, Woodstock Rd,

Oxford OX2 6GG

Mail: [nir.shalev@psy.ox.ac.uk](mailto:nir.shalev@psy.ox.ac.uk)

## Abstract

To perform a task continuously over an extended period of time, it is necessary to maintain an adequate level of arousal. In cognitive research, traditional studies have used repetitive, monotonous tasks to learn about the dynamics of arousal in tasks that require sustained vigilance, such as driving or monitoring a factory line. To date, studies have rarely considered whether observers use task-embedded regularities in such continuous contexts to anticipate events and regulate arousal accordingly. In the current study, we explored whether arousal is an adaptive process that reacts to stimulus predictability. Across two experiments, we used pupillometry as a proxy measure of arousal in human observers performing continuous tasks. Within the tasks, we manipulated the temporal predictability of relevant events by presenting stimuli either in a fixed rhythm or at varied intervals. Temporal predictability led to the lowering of tonic levels of arousal. Trial-wise temporal structures led to short-scale changes in pupil size related to temporal anticipation. Accordingly, we suggest that arousal is sensitive to varying levels of temporal predictability and dynamically adapts to task demands to bring about performance benefits as well as energetic efficiencies overall.

## Introduction

The ability to anticipate the timing of an upcoming event allows us to prepare and perform more efficiently (Nobre & Van Ede, 2018). In experimental settings, temporal expectations are typically manipulated on a trial-by-trial basis, to estimate the behavioural benefits of anticipating an imperative task-relevant stimulus that follows a temporally informative cue (Coull & Nobre, 1998), a short rhythmic stimulation (Jones, 2010), learned temporal probabilities (Ghose & Maunsell, 2002), or sequential effects (Capizzi, Correa, Wojtowicz, & Rafal, 2015). These experimental approaches are highly relevant when trying to map the mechanisms that support temporal anticipation of discrete cognitive events. Much less is known about how anticipation of events unfolds when we engage continuously with extended cognitive tasks (Shalev, Bauer, & Nobre, 2019). Arguably, the transition from discrete task events towards continuous task performance is an important step toward understanding human behaviour in natural settings. Many forms of human behaviour require extended focus and repetitive patterns, such as: driving home from work, sewing a quilt blanket, or monitoring a data stream during an experimental session for occasional artifacts. Such tasks require maintaining arousal over an extended period of time.

Experimentally, such situations are studied using Continuous-Performance Tasks (CPT). Most CPT studies have emphasised the role of sustained attention and arousal functions (Davies & Parasuraman, 1982; Robertson & O'Connell, 2010; Sarter, Givens, & Bruno, 2001). However, it is possible that briefer modulations linked to selective temporal expectations also affect performance. In CPT, the temporal structure is typically defined by the intervals between successive perceptual events, irrespective of motor responses. For example, imagine yourself practising your tennis skills using a tennis-ball machine. The machine continuously shoots tennis balls at a certain pace, regardless of whether you managed to hit a ball. The machine may shoot balls at regular or irregular intervals. If the observer is sensitive to the temporal

structure of events, then two factors likely influence performance: sustaining an appropriate state of arousal (Mackworth, 1968) and the ebb and flow of momentary temporal attention to an imperative stimulus (i.e., the tennis ball).

Hebb (1955) discussed arousal as a non-specific cognitive resource that “in effect makes organised cortical activity possible”. Arousal is characterised by an inverted U-shaped curve with performance best at intermediate arousal levels and falling off progressively toward the two extremes of sleep (low arousal) and anxiety (high arousal) (Aston-Jones & Cohen, 2005; Hebb, 1955). Neural control of arousal occurs through noradrenergic modulation arising in locus coeruleus of the brainstem reticular activating system (Steriade, 1996), which in turn is regulated by cortical feedback (Aston-Jones & Cohen, 2005). When performing a cognitive task, it has been proposed that the regulation of the locus coeruleus-noradrenergic response varies in accordance with levels of task uncertainty (Yu & Dayan, 2005). Reduced uncertainty promotes a state of task ‘exploitation’, which is associated with reduced tonic arousal, alongside short-living phasic increases, in accordance with task demands. Exploitation is contrasted with ‘exploration’, whereby high uncertainty efforts a continuous state of high tonic arousal (Dayan & Yu, 2006).

Arousal is often discussed in the context of continuous vigilance tasks (Robertson & O’Connell, 2010), but its ability to adapt according to stimulus predictability in such contexts has not been investigated. This question is particularly important, given the prevalence of CPT designs in which targets and distractors are presented rhythmically and therefore with a high level of predictability (Conners & Staff, 2000; Robertson, Manly, Andrade, Baddeley, & Yiend, 1997).

In CPT, regular stimulus intervals could provide a useful source of temporal predictability capable of modulating cognitive arousal. This possibility was partially supported by a recent study in which temporal predictability was manipulated during a CPT (Dankner, Shalev, Carrasco, & Yuval-Greenberg, 2017). Individuals monitored a stimulus stream in a continuous task and responded to occasional pre-defined

targets. The results showed that when targets appeared in a fixed rhythm, participants were faster and were more likely to inhibit their eye movements before stimulus onset. To our knowledge, this study provided the first evidence for the formation and benefits of temporal expectations while performing a CPT. In our current study, we take the next important step and investigate whether performance benefits of temporal expectations within a CPT could come about through modulation of arousal levels.

Valid temporal expectations about the onsets of events in CPT can be a strong source of uncertainty reduction. Accordingly, we hypothesised that temporal predictions within CPT would lead to changes in arousal. Increasing temporal uncertainty would be associated with higher levels tonic arousal, but the availability of temporal regularities would enable a more efficient management of arousal. Any CPT design inherently contains task-relevant, predictive temporal structures that can, in principle, aid performance. Even when the intervals between task-relevant stimuli vary, informative temporal structures come about through learned associations based on the trial history of temporal intervals and the cumulative conditional probability of events occurring given the span of intervals. Furthermore, many CPT tasks use constant intervals, thereby providing a deterministic rhythmic structure that could support significant reduction of tonic arousal by strong temporal expectation.

We measured perceptual discrimination and pupil size during a continuous-performance task to test whether temporal expectations improve behaviour and modulate arousal. Two experiments using slightly different designs asked the same questions, ascertaining whether the findings were reproducible and generalisable. In both experiments, we manipulated whether target events occurred in a temporally predictable or unpredictable fashion. Behavioural measures of perceptual discrimination tested whether performance improved when target onsets were fully predictable. In humans and in non-human primates, the firing rate at the locus coeruleus-noradrenergic system and associated arousal levels are marked by changes

to pupil size (Rajkowski, 1993). Thus, pupil size during continuous-performance tasks provides a proxy measure for the arousal-related system. Pupil traces probed whether the overall level of temporal expectations modulated the tonic arousal tone, and tested whether local changes in temporal expectation within the task were linked to short bursts of arousal related to stimulus anticipation.

## Results

In the first experiment, individuals monitored a continuous stream of task-relevant stimuli presented either at fixed (every 3500 ms) or variable intervals (in a range between 2500 to 4500ms). The rhythmic and variable-interval conditions alternated implicitly every three minutes while participants completed the task on a single run lasting approximately 12 minutes with no breaks. Target and distractor stimuli briefly replaced a visual mask otherwise continuously presented during the inter-stimulus interval. Participants were instructed to respond when a pre-defined target appeared within the stimulus stream (66% of the stimuli were target), while ignoring non-targets (see figure 1 and Methods section). In our second experiment, we aimed to replicate our findings. This time, participants made fine perceptual discriminations in a continuous task. They indicated the direction of an arrow that briefly for replaced a mask at varying durations, in a way that allowed us to model the data using a computational model of visual attention (TVA; (Bundesen, 1990)). Fixed and Variable intervals were presented in alternating blocks (see figure 3 and Methods section).

### *Experiment 1*

#### Behavioural data

Our results indicated that participants were better at detecting a target after 3500 ms when it appeared within a Fixed block, compared to a Variable block ( $t(24)=4.05$ ;  $p>.001$  95%CI=[.2597;. 7988]). There were no differences in the response bias ( $\beta$ ) ( $p=.455$ ). Descriptive data across intervals and conditions appear in Table#1. An

illustration of the task, and the perceptual sensitivity for targets in the two conditions, appears in Figure 1.

|         | Fixed      | Variable          |                   |            |                   |                   |
|---------|------------|-------------------|-------------------|------------|-------------------|-------------------|
|         | 3500 ms    | 2500 –<br>2750 ms | 3000 –<br>3250 ms | 3500 ms    | 3750 –<br>4000 ms | 4250 –<br>4500 ms |
| $d'$    | 2.82 (.11) | 2.09 (.11)        | 2.10 (.14)        | 2.29 (.10) | 2.46 (.09)        | 2.37 (.11)        |
| $\beta$ | -.16 (.08) | .03 (.06)         | -.08 (.07)        | -.11 (.06) | -.07 (.06)        | -.09 (.07)        |

*Table 1: descriptive statistics. Mean and standard errors (in parenthesis) of perceptual sensitivity ( $d'$ ) and response bias ( $\beta$ ) at different intervals and conditions. The left column represents the means during Fixed blocks, when all intervals were 3500 ms. The other five columns show the average perceptual parameters in Variable blocks split by interval range: when intervals were 1) 2500 and 2750 ms; 2) 3000 and 3250 ms; 3) 3500 ms; 4) 4000 and 4250 ms; 5) 4250 and 4500 ms*

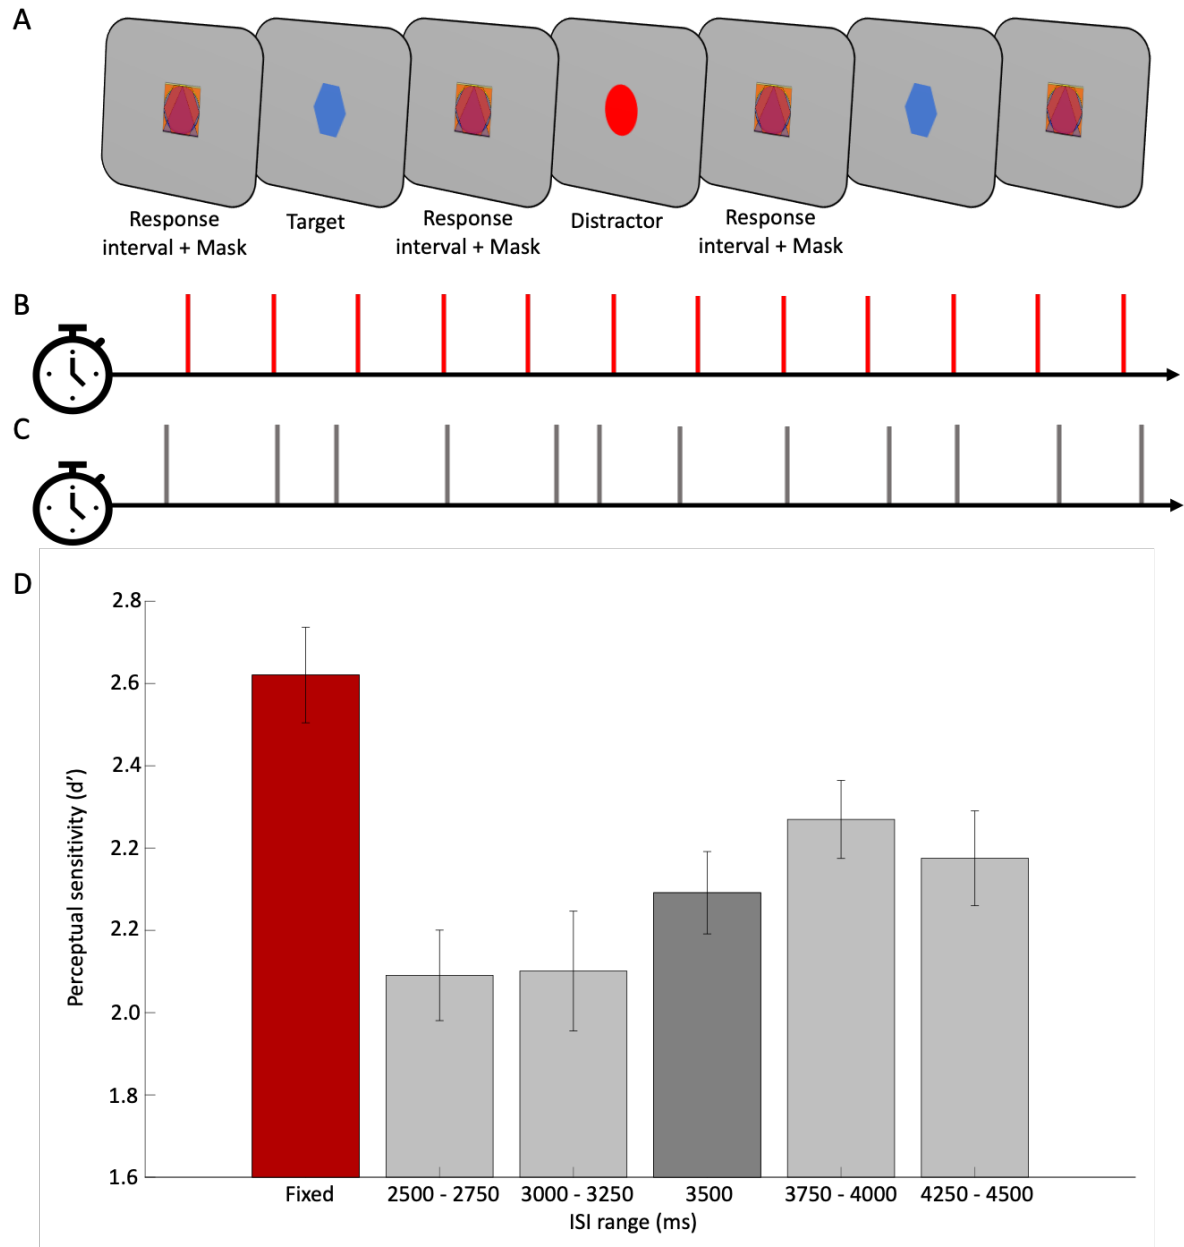

Figure 1: (A) a schematic illustration of the different conditions in the CPT. Participants had to respond when identifying a target (blue hexagon, designated as a 'target') and ignore all other shapes (for example a red circle, designated as a 'distractor'). The stimuli – targets and distractors – were masked during the interstimulus intervals ('mask'). Targets and distractors were presented in two conditions (blocked), which repeated two times on each experimental run. They were either presented at (B) fixed, 3500-ms intervals; or (C) at varied intervals between 2500 and 4500 ms in steps of 250 ms. In (D) we compare the perceptual sensitivity to targets appearing after 3500 ms intervals in the two experimental conditions. The red bar represents the mean perceptual sensitivity in Fixed blocks, during which all intervals were equal to 3500 ms. The grey bars depict the mean  $d'$  on different subsets trials in variable blocks, based on the inter-stimulus intervals. Error bars represent the standard error of the mean

In addition to the performance benefit in the fixed-interval condition, the data in Figure 1 revealed a pattern of increase in perceptual sensitivity as a function of the inter-stimulus interval in the variable-interval condition. Such a pattern is in line with previous reports of the increase in the conditional probability for targets to appear as



a source that drives temporal anticipation ('hazard rates') (Ghose & Maunsell, 2002; Janssen & Shadlen, 2005). To evaluate this pattern statistically, we used an ANOVA to test for a linear contrast. The dependant variable was the mean perceptual sensitivity, and the interval range was the independent factor. We included only trials in Variable blocks. The result indicated a significant linear trend ( $F(1,24)=9.668$ ;  $p=.005$ ; partial  $\eta^2=.287$ ).

### Pupillometry data

Our first analysis of the pupillometry data compared tonic differences in arousal level across trials, as a marker of adapting arousal to the temporal properties of the task. We contrasted the mean pupil size over the full duration of Fixed vs. Variable blocks. Figure 2a shows the average standardised pupil size throughout entire experimental blocks, separated by block type. The two standardised signals were compared using a linear mixed-effect model, which included the Block Type as a fixed factor, and a maximal random-effects structure (Barr, Levy, Scheepers, & Tily, 2013) that included intercepts for each participant, as well as by-participant slopes for the effect of Block Type. There was a significant difference between the two conditions ( $t(8886499)=2.65$ ;  $p=.008$ ; 95%CI[.08;.55]). The overall mean standardised pupil size on each condition is presented in Figure 2b.

Our second set of analyses characterised anticipation-related short-term changes in pupil diameter. We constructed a time series of the standardised pupil size immediately after stimulus onset and throughout a trial until the onset of the subsequent stimulus, to observe event-locked changes in pupil size. Figure 2c shows the contrast between the mean pupil size in Fixed blocks and in Variable blocks. After the minimal inter-stimulus (2500 ms), the time series in Variable blocks include a varying and decreasing number of observations until the maximum interval of 4500 ms.

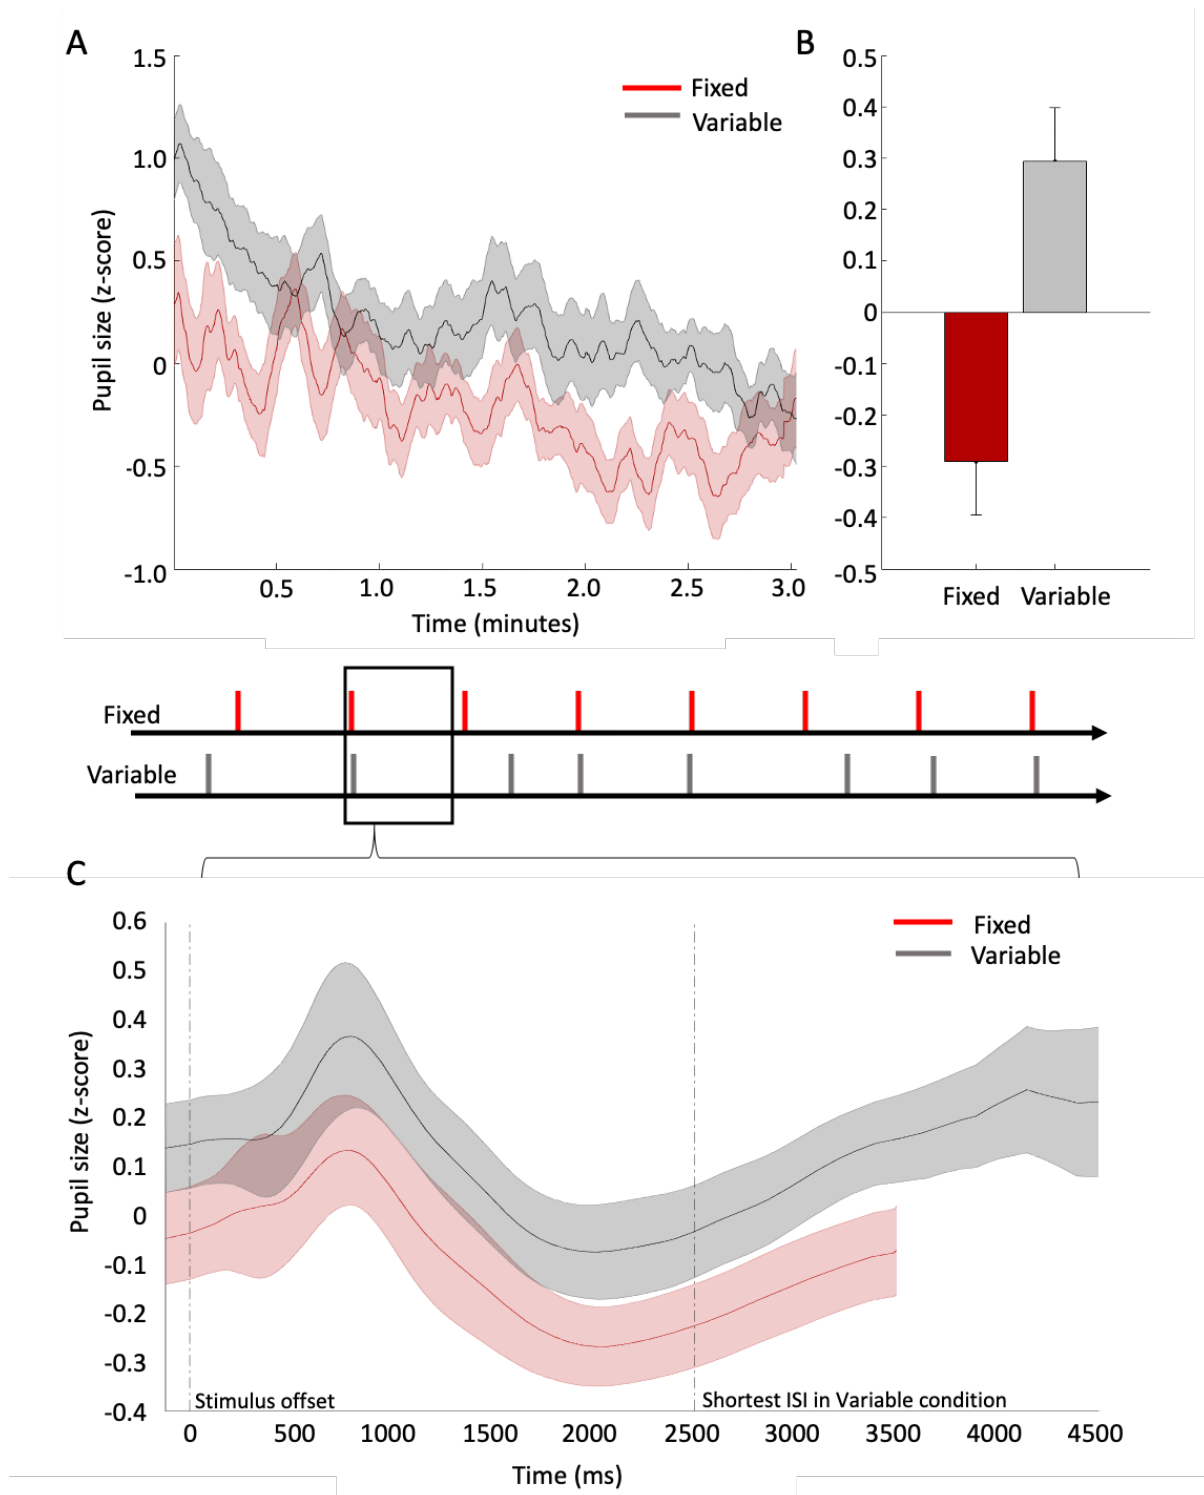

Figure 2: A) average pupil size (standardised) in Fixed blocks (in red) and Variable blocks (in grey) over the duration of experimental blocks, lasting approximately 3 minutes. Lines represent the mean and shaded error bars represent standard error. For illustration purposes, data were smoothed using a time window of 7000 ms (equivalent to an average duration of two trials) and the data were standardised by converting the raw pupil size to z-scores. The conversion was done separately for each participant, based on the mean pupil size (and standard deviation) throughout the entire experimental run (irrespective of experimental condition). (B) contrasting the mean pupil size (standardised z-scores) during Fixed blocks (red bars) vs. Variable blocks (grey bars). Error bars represent standard error. average pupil size (standardised) in Fixed blocks (in red) and Variable blocks (in grey) over the duration of experimental trials. Lines represent the mean and shaded error bars represent standard error. All trials in Fixed blocks lasted 3500 ms. In Variable blocks, trial duration varied in range between 2500 ms and 4500 ms for the longest trials. Therefore, the grey time series includes a varying and decreasing number of observations within the range of 2500 – 4500 ms following stimulus offset. For illustration purposes, data were smoothed using a time window of 250 ms (equivalent to the gap between two adjacent interstimulus intervals in the Variable condition). The data were standardised by converting the raw pupil size to z-scores. The conversion was done separately for each participant, based on the mean pupil size (and standard deviation) throughout the entire experimental run (irrespective of experimental condition)

We used the stimulus-locked time series to retest for tonic differences, this time at a trial level. We focused on the 2500 ms time window immediately after stimulus offset, to include all the trials in both conditions. To compare between conditions, we used a Linear Mixed-effects Model, which included the Block Type as a fixed factor, and a maximal random-effects structure (Barr et al., 2013) that included intercepts for each participant, as well as by-participant slopes for the effect of Block Type. We ran this model using the mean standardised pupil size as the dependent variable (the data depicted in Figure 2c), and identified a significant difference between the two conditions ( $t(124999)=2.36$ ;  $p=.018$ ; 95%CI[.03;.34]). For completion, we used the same design to model variation in the raw pupil size. The result confirmed a significant difference between the Block Types ( $t(12390048)=2.30$ ;  $p=.021$ ; 95%CI[4.51;56.83]).

As seen in Figure 2c, after the initial stimulus-related pupillary response a similar gradual increase in pupil size occurred in both Fixed and Variable conditions, commencing approximately 2000 ms after stimulus onset time. In the Variable condition, the increase in pupil size followed the increasing conditional probability for stimulus presentation. To characterise this trend statistically, we modelled the data using a linear regression. First, for each participant, we calculated the mean time series of pupil size between 2000 ms after onset, until 4500 ms. The data were then fitted and compared to a constant model. The result indicated a significant slope ( $R^2=.158$ ;  $F(1,62498)=11767$ ;  $p<.001$ ; partial  $\eta^2=.158$ ).

## *Experiment 2*

### Behavioural data

Data were modelled separately for each block type (Fixed vs. Variable) using the LibTVA (Dyrholm et al., 2011; Kyllingsbaek, 2006), a MATLAB toolbox available online to generate TVA model based on empirical datasets. To validate the reliability of the model, we calculated the correlations between the original data and the predicted

data on each exposure duration. The mean Pearson's  $r$  score between the predicted and the original performance data was 0.95, confirming a large effect size. The processing-speed parameter was affected by temporal expectations, with faster processing rate in Fixed ( $v=17_{\text{items/minute}}$ ;  $SE=1.6$ ) compared to Variable ( $v=15_{\text{items/minute}}$ ;  $SE=1.4$ ) blocks;  $t(25)=2.18$ ;  $p<.05$ ;  $95\%CI[.08;3.09]$ ). There was no difference in the perceptual threshold between the two conditions ( $t(25)=-1.631$ ;  $p=.115$ ;  $95\%CI[-2.83;.32]$ ).

Comparison of the rate of correct responses (for targets presented for 40, 70 or 100 ms; see Methods section) provided a complementary measure of the benefits of temporal expectation on performance. To compare performance in Fixed and Variable blocks, we focused on the 3500 ms (see figure 3b). The results indicated a significant difference in accuracy between conditions (Coefficient Estimate = .09;  $SE=.04$ ;  $t(7490)=2.22$ ;  $p=.025$ ;  $95\%CI=[.01;.16]$ ). Participants were more accurate when responding to targets presented at a fixed rhythm (.58;  $SE=.005$ ) compared to variable rhythm (.56;  $SE=.013$ ). There was also a main effect of exposure duration on accuracy ( $t(7490)=14.52$ ;  $p<.001$ ;  $95\%CI=[.03;.04]$ ), but the two variables did not interact ( $p=.6$ ).

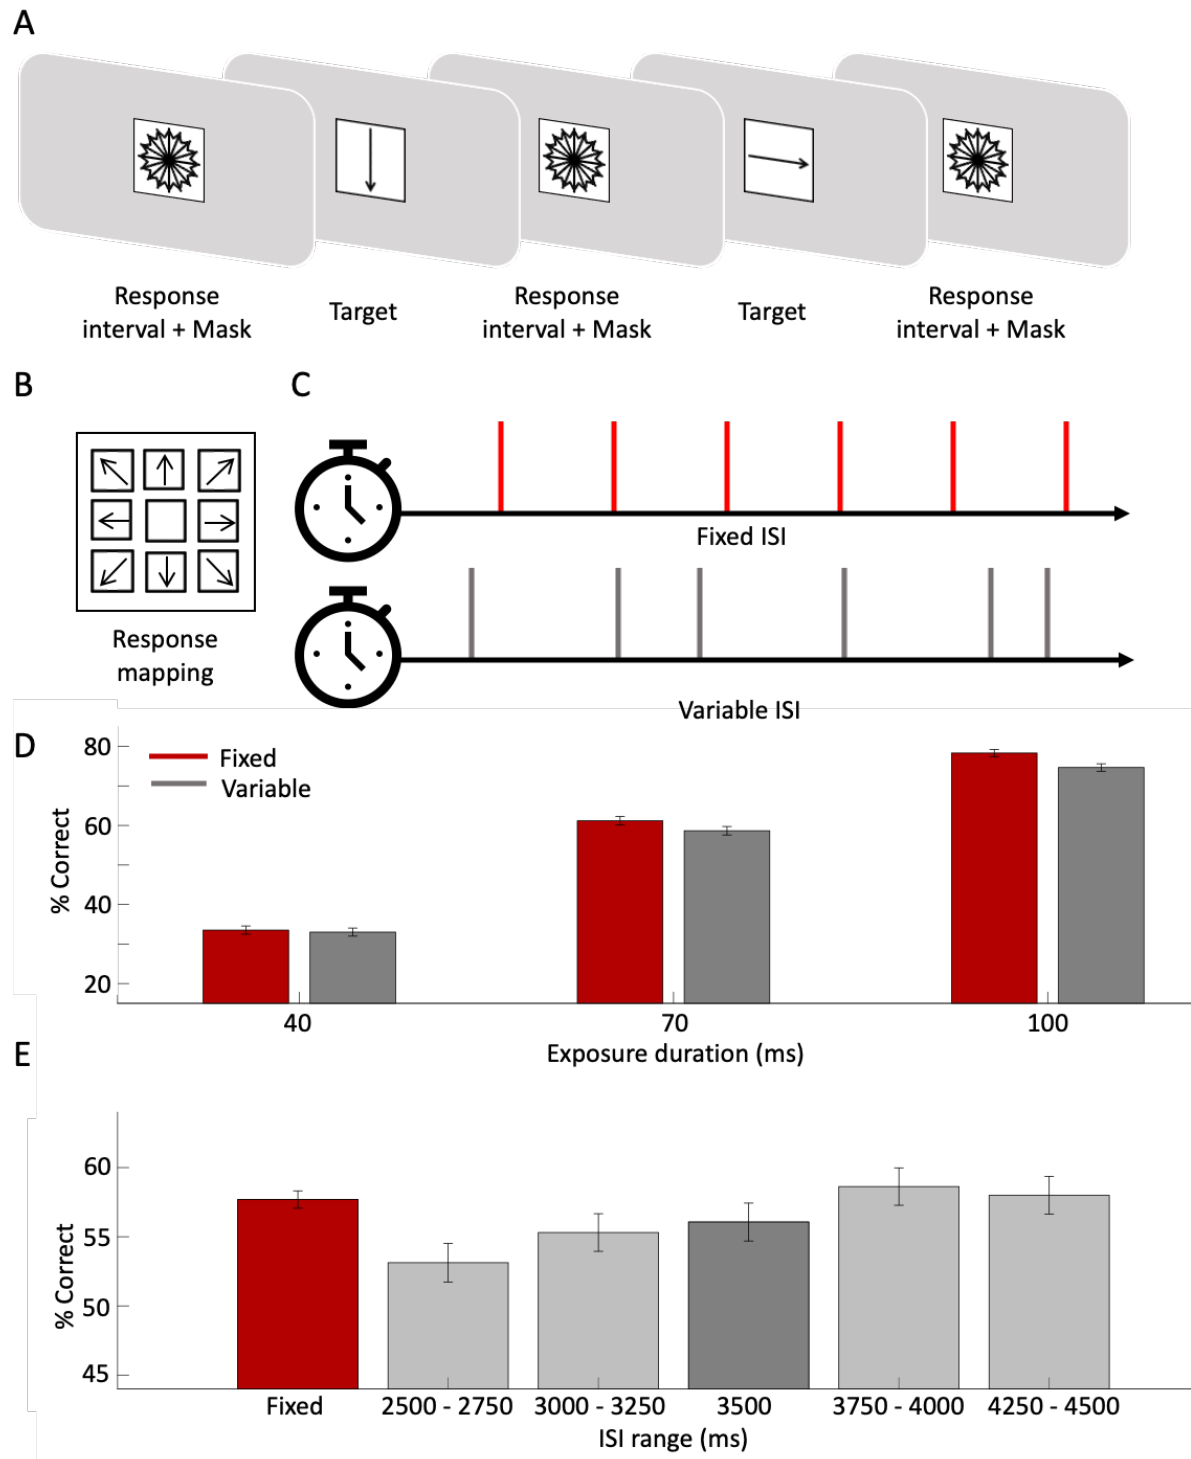

Figure 3: (A) A schematic outline of the experimental design and the response mapping: a visual mask, made of overlapping arrows organized in a circle, appeared at the centre of the screen during the inter-stimulus interval. The inter-stimulus interval was determined according to the experimental condition (with a minimum of 2.5 sec); the mask was replaced by a single arrow, appearing for a variable duration: 10/20/40/70/100 ms, and immediately masked again, and participants were instructed to respond while the mask was presented, or do nothing if they did not perceive the target; (B) participants used the keyboard numpad, where eight arrows were drawn on stickers to indicate the response mapping. As in the illustration, the direction of the arrows corresponded to their locations to assist participants and allow them to respond without moving their eyes from the screen. Participants were instructed to respond only if they were fairly certain to have perceived the stimulus; (C) there were two blocked conditions: a fixed block, in which targets appeared in a fixed 3500-ms rhythm (red) and a Variable block in which intervals varied between 2500 and 4500 ms based on a flat distribution of 20 possible intervals equally spaced every 100 ms (D) comparing percentage of correct responses to targets appearing after 3500 ms intervals in the two experimental conditions (Fixed – in red and Variable – in Grey), by exposure duration. Error bars represent the standard error of the mean. (E) The red bar represents overall performance in Fixed blocks, during which all intervals were equal to 3500 ms. The grey bars depict the mean performance on different subsets trials in variable blocks, based on the inter-stimulus intervals. Error bars represent the standard error of the mean

As in Experiment 1, the data in the Variable blocks also revealed benefits in performance that followed the hazard rate (figure 3c). To evaluate this pattern statistically, we modelled the data using a GLMM with the ISI range as a fixed factors, and the mean accuracy as the dependant variable (see Methods section for full model specifications). We included only trials in Variable blocks. The result indicated a positive coefficient (.084; SE=.025) which was found significant ( $t(4450)=3.29$ ;  $p=.001$ ; 95%CI=[.03;.13]).

### Pupillometry data

To compare tonic modulation of pupil size between Fixed and Variable blocks, we contrasted the mean pupil size over the full duration of the two different block types. Figure 4a shows the average standardised pupil size throughout entire experimental blocks, separated by block type. The two standardised signals were compared using a linear mixed-effect model, which included the Block Type as a fixed factor, and a maximal random-effects structure (Barr et al., 2013) that included intercepts for each participant, as well as by-participant slopes for the effect of Block Type. There was a significant difference between the two conditions ( $t(18043999)=2.9$ ;  $p=.003$ ; 95%CI[.06;.34]). The overall mean standardised pupil size on each condition is presented in figure 4b. For completion, we then repeated the same contrast only this time by using the raw values. Again, the difference between the two conditions was significant ( $t(18043999)=2.06$ ;  $p=.039$ ; 95%CI[3.05; 121.62]).

As in Experiment 1, our second set of analyses characterised short-term changes in pupil diameter related to temporal anticipation. We constructed a time series of the standardised pupil size immediately after stimulus onset and throughout a trial until the onset of the subsequent stimulus, to observe event-locked changes in pupil size. Figure 4c shows the contrast between the mean pupil size in Fixed blocks and in Variable blocks. After the minimal inter-stimulus interval in Variable blocks

(2500 ms), time series include a varying and decreasing number of observations until the maximum interval of 4500 ms.

We used the stimulus-locked time series to retest for tonic differences, this time at a trial level. We focused on the 2500 ms time window immediately after stimulus offset, to include all trials in both conditions. To compare between conditions, we used a Linear Mixed-effects Model, which included the Block Type as a fixed factor, and a maximal random-effects structure (Barr et al., 2013) that included intercepts for each participant, as well as by-participant slopes for the effect of Block Type. We ran this model using the mean standardised pupil size as the dependant variable (the data depicted in Figure 4c), and identified a significant difference between the two conditions ( $t(129999)=2.36$ ;  $p<.001$ ; 95%CI[.07;.24]).

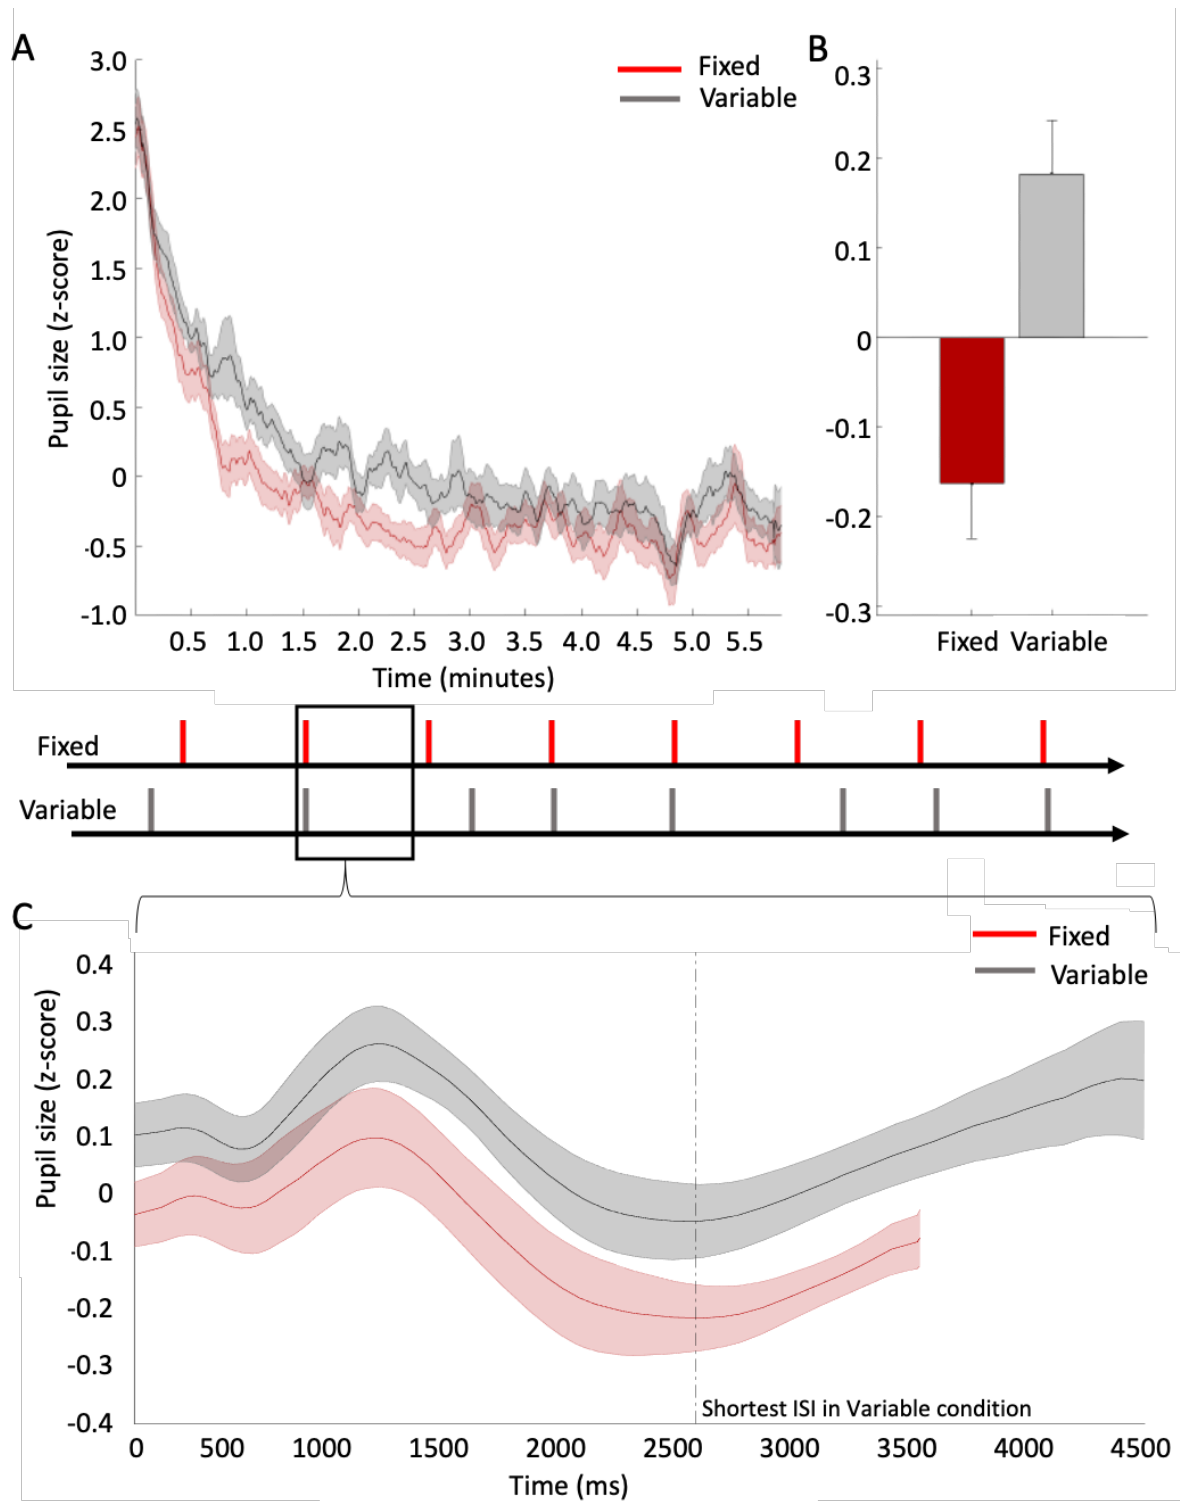

Figure 4: (A) average pupil size (standardised) in Fixed blocks (in red) and Variable blocks (in grey) over the duration of experimental blocks, lasting approximately 6 minutes. Lines represent the mean and shaded error bars represent standard error. For illustration purposes, data were smoothed using a time window of 7000 ms (equivalent to an average duration of two trials) and the data were standardised by converting the raw pupil size to z scores. The conversion was done separately for each participant, based on the mean pupil size (and standard deviation) throughout the entire experimental run (irrespective of experimental condition). (B) contrasting the mean pupil size (standardised z-scores) during Fixed blocks vs. Variable blocks. Error bars represent standard error. (C) average pupil size (standardised) in Fixed blocks and Variable blocks over the duration of experimental trials. Lines represent the mean and shaded error bars represent standard error. All trials in Fixed blocks lasted 3500 ms. In Variable blocks, trial duration varied in range between 2500 ms and 4500 ms. Therefore, the grey time series includes a varying number of observations within the range of 2500 – 4500 ms following stimulus offset. For illustration purposes, data were smoothed using a time window of 250 ms. The data were standardised by converting the raw pupil size to z scores. The conversion was done separately for each participant, based on the mean pupil size (and standard deviation) throughout the entire experimental run (irrespective of experimental condition).



As in Experiment 1, a similar gradual increase in pupil size occurred in both Fixed and Variable conditions, in anticipation of target onset time. To test for significant increases in pupil size in the Variable condition, we used a linear model to estimate the slope of increase, repeating the same procedure as in Experiment 1: for each participant, we calculated the mean time series of pupil size between 2000 ms after onset, until 4500 ms. The data were then fitted and compared to a constant model. The result indicated a significant slope ( $R^2=.199$ ;  $F(1, 64998)=16156$ ;  $p<.001$ ; partial  $\eta^2=.199$ ).

## General Discussion

Across our two experiments, we found clear evidence that temporal structures embedded in continuous-performance tasks give rise to expectations that benefit behaviour and adjust the state of tonic arousal and drives short-scale pupil dynamics accordingly. When fixed temporal intervals maximised temporal expectations, superior behavioural performance was achieved while a more efficient energetic state was maintained overall. When variable intervals were used, arousal levels were regulated according to sources of temporal prediction extracted over the long term (hazard rates).

The change in pupil size provided an effective proxy measure of arousal. Our results revealed striking and reproducible effects of temporal regularities on the arousal function, revealing arousal to be flexible and adaptive adjusting to regularities at different time scales. Within CPT, we observed the tonic level of arousal to adjust in line with the level of temporal uncertainty. The continuous context of our task, in which individuals cannot temporarily disengage between discrete trials, was especially conducive for observing the changing patterns of arousal. In Fixed blocks, with high temporal certainty, arousal levels were lower overall. In Variable blocks, with relatively higher temporal uncertainty, participants maintained tonically elevated

levels of arousal. Pupil dilation was also sensitive to local modulations of arousal according to different sources of temporal prediction when variable intervals were present. In the context of Variable blocks, we observed transient increases in pupil dilation that followed the mounting temporal conditional probability for the occurrence of relevant event as trial interval increased between 2500 and 4500 ms.

Our findings align well with the framework of the Adaptive Gain Theory, which proposes that an increase in uncertainty leads to tonic increases in arousal (Aston-Jones & Cohen, 2005). In both Fixed and Variable conditions there were temporal structures that aided performance. However, in the Fixed condition these were more robust: anticipation could rely on a high degree of predictability. Variable blocks required a higher degree of temporal exploration, in which participants 'forage' for task-relevant events over time. In contrast, the high temporal certainty in the Fixed blocks afforded a state of exploitation in which tonic arousal remained low. Participants could anticipate the task-relevant events, and regulate arousal only transiently, to perform at high levels.

In line with previous studies, we were able to reveal changes in pupil size occurring proactively in the period of anticipation before stimulus onset (Friedman, Hakerem, Sutton, & Fleiss, 1973; Jennings, Van Der Molen, & Steinhauer, 1998). However, to our knowledge, our study is the first to show the adaptation of arousal operating within continuous-performance tasks. These measures of arousal modulation can be directly linked to temporal expectation, and isolated from motor decisions and reward.

Behavioural-performance results also provide an important extension to previous work by showing that temporal expectation improves perceptual capacity within extended task contexts. Although it was shown that individuals can form temporal anticipation based on rhythmic structures in a continuous task (e.g., Dankner et al., 2017), the behavioural outcomes were based on enhanced response speed. To our knowledge, we present the first evidence for perceptual benefits of temporal

expectation in CPT independent of motor preparation. Our tasks placed no emphasis on motor performance: In Experiment 1, we used a task that yielded individual differences in perceptual parameters by using forward and backward masking (Shalev, Humphreys, & Demeyere, 2016, 2018; Shalev, Vangkilde, et al., 2019). In Experiment 2, participants performed fine perceptual discriminations. They were encouraged to focus on accuracy rather than speed and they were permitted to skip responses. By manipulating stimulus durations we replicate and extend the benefit of temporal expectation for visual processing speed (Sørensen et al., 2015; Vangkilde et al., 2013; Vangkilde et al., 2012) in a continuous-performance context.

From a wider perspective, it is important to appreciate that rhythmic CPTs are highly prevalent in basic and clinical research and applications, often employed as an elementary neuropsychological tool when assessing sustained-attention. Interestingly, a recent study showed impaired capacity to form temporal predictions on a CPT among individuals diagnosed with ADHD (Dankner et al., 2017). Our findings may carry a further implication: the inability to form temporal predictions may also reflect an inability to make the appropriate adjustments of arousal. Such a hypothesis provides an important link between the potential timing difficulties in ADHD and the capacity of sustaining performance over extended time. Indeed, a significant proportion of popular tasks in use for cognitive assessment of attention difficulties relies on CPT designs with a fixed rhythmic structure (e.g., Conners & Staff, 2000; Lee & Park, 2006; Robertson et al., 1997). Based on our findings, future inquiries may wish to study sustained performance not only using fixed, but also variable task rhythms, to understand the interactions between arousal and anticipation among diverse populations.

## **Methods: Experiment 1**

Experimental procedures were reviewed and approved by the central university research ethics committee of the University of Oxford.

## *Participants*

Thirty neurotypical young adults participated in this study (20 of whom were female, mean age 25, SD=3.2). The sample size was chosen based on previous and ongoing studies using the same behavioural manipulation (Shalev et al., 2016, 2018; Shalev, Vangkilde, et al., 2019). Pilot data contrasting pupil size in a comparable continuous context (variable and fixed rhythms) have yielded medium to large effect sizes (Cohen's  $d$  values ranging between .5 to .7) using comparable samples (ranging between 25-30 participants per experimental group.) Power was calculated based on an effect size of .6 and a two-tailed significance level of .05 to yield a Power ( $1-\beta$  error probability) of 0.8, and resulted with a minimum sample size of  $N=24$ . Participants were recruited through an online research-participation system at the University of Oxford. All were right-handed and had normal or corrected eyesight (based on self-reports). They were compensated for their time (£10 per hour).

## *Apparatus*

A PC with an i7 processor and a 2-GB video card was used for displaying stimuli and recording behavioural data. The task was generated using Presentation software (Neurobehavioural Systems, Albany, CA). The stimuli were presented on a 24" LED monitor, with a screen resolution of 1080 X 1920 and a refresh rate of 100 Hz. All stimuli were preloaded to memory using the presentation software to minimise temporal variability in stimulus display.

## *Experimental design*

Participants were requested to respond to target shapes and to ignore distractor shapes (see figure 1 for a schematic illustration). Targets and distractors briefly (120-ms duration) replaced a multi-shape masking stimulus (mask) that was otherwise continuously present. The masked version of the CPT was originally designed to

reveal individual differences using perceptual parameters and has been validated in various populations (Shalev et al., 2016, 2018; Shalev, Vangkilde, et al., 2019). Uniquely, in the current study the temporal regularity with which target and distractor shapes appeared was manipulated across conditions.

The mask comprised four superimposed figures (square, triangle, circle and hexagon) in different colours (blue, red, and green). Its total size was 5 degrees of visual angle, both horizontally and vertically. The mask appeared and remained at the centre of the screen, disappearing only when replaced by either a target or a distractor shape for 120 ms. The mask then reappeared immediately, generating pre- and post-masking of each target or distractor. The target shape was a blue hexagon, and distractor stimuli were either similar in colour to the target (blue circle or diamond), similar in shape (red or green hexagon), or completely different (green circle and red diamond). All distractor types appeared with an equal distribution. Two-thirds of events were targets and the rest were distractors. Distractors and targets appeared at the centre of the screen and occupied a square of 5 degrees of visual angle vertically and horizontally. Participants were instructed to press the 'space bar' whenever they detected targets, while ignoring and refraining from responding to distractors, in a continuous stream of stimuli lasting approximately 12 minutes (altogether, 133 target and 67 distractor stimuli appeared in between mask stimuli).

The interstimulus intervals (ISIs) between critical stimulus events (targets and distractors) were manipulated to vary the degree of rhythmic temporal expectation. There were four concatenated blocks of trials (not explicitly signalled) alternating between Fixed and Variable conditions. During Fixed blocks, targets and distractors appeared predictably every 3.5 seconds, in a rhythmic fashion. During Variable blocks, targets and distractors appeared unpredictably at intervals between 2.5 and 4.5 seconds (mean 3.5 seconds) with an equal probability for each ISI (drawn from 9 possible intervals, equally spaced between 2500 ms and 4500 ms in gaps of 250 ms).

Fixed and Variable blocks were always interleaved, and their order was randomised among participants.

### *Procedure*

The experiment took place in a dark testing room. Participants sat 50 cm from the monitor, and a chin rest was used to keep their head still. The experimenter was also sitting in the room, behind the participant, to monitor behaviour. The task instructions appeared on the screen and were explained to the participant by the experimenter, who also answered any questions about the procedure. The session lasted approximately 12 minutes, and commenced with a short practice session of 10 trials.

### *Statistical analysis*

*Behavioural benefit:* First, we sought to verify whether individuals utilised rhythmic structures to benefit behaviour (as previously observed by (Dankner et al., 2017)). Responses were categorised as being: a correct response (responding to target), a correct rejection (withholding response to distractor), a false alarm (responding to distractor), or an omission (not responding to target). We derived perceptual parameters based on the Signal Detection Theory (SDT; Green and Swets, 1966) to estimate the perceptual sensitivity ( $d'$ ) and response bias ('criterion';  $\beta$ ). To correct for extreme cases where performance reached ceiling, we applied a loglinear correction (Hautus, 1995)

First, we focused only on perceptual judgments that followed a 3.5 seconds interval, which was used in the isochronous rhythmic blocks and preceded 20% of the trials in the Variable condition, since this allowed us to learn whether responses to targets were affected by the fixed/variable contexts, while controlling for other temporal factors that may influence performance, such as hazard rates (Nobre & Rohenkohl, 2014). Subsequently, to estimate the contribution of hazard rates to performance, we calculated the perceptual sensitivity on five ranges of intervals

between stimuli: trials that followed 2500 – 2750 ms intervals; 3000 – 3250 ms; 3500 ms; 3750 – 4000 ms; 4250 – 4500 ms. We used an ANOVA test to evaluate a linear contrast, as an indication for an increase in perceptual performance as a function of the interval range.

*Pupillometry:* Pupil size was recorded using a 2000-Hz sampling rate (1000 Hz per pupil), allowing the construction of time series. The analysis procedure first focused on overall differences in pupil size between conditions to identify tonic effects related to temporal expectations (*Tonic Effects* – a further description appears below). Consistent with the task parameters, the optimal time frame for identifying tonic effects within a trial was the period of 2.5 seconds following stimulus onset (2.5 seconds being the shortest ISI and therefore allowing the inclusion of all trials). In addition, we estimated tonic effects by averaging pupil size during entire blocks (50 trials, over 3 minutes). Then, to identify markers of pupil changes due to temporal expectation, we analysed the changes in pupil size during the 1-second period preceding stimulus onset (*Anticipation* – a further description appears below). The raw pupil data were converted to a data matrix using a MATLAB script, excluding data from practice and breaks between blocks. Blinks were interpolated using a cubic spline interpolation (Mathôt et al., 2013), using a dedicated Matlab function available as part of the Pupil Response Estimation Toolbox (PRET) (Denison, Parker, & Carrasco, 2019). Data were smoothed using a 20-ms moving time window, which corresponded to two refresh cycles of the LCD monitor.

Tonic differences in arousal between conditions were calculated based on a direct comparison of standardised pupil size. Raw data were first converted to z scores, by calculating for each participant separately the mean and standard deviation of pupil size throughout the entire experiment and converting all the pupil samples to z scores. We then calculated the mean standardised pupil time-series for each participant, on each block type, which resulted in a time series extending over

approximately 3 minutes, consisting ~180,000 samples (sampling rate in milliseconds). We fitted the data using a Linear Mixed-effects Model (LMM), which included the Block Type as a fixed factor and a maximal random-effects structure (Barr et al., 2013) that included intercepts for each participant, as well as by-participant slopes for the effect of Block Type.

The influence of *Anticipation* on pupil dynamics was evaluated based on the pupil-dynamics that followed stimulus presentation, until the appearance of the next one. Accordingly, we constructed two time-series of different lengths: 3500 ms in Fixed blocks, which was the same interval throughout the experiment; and 4500 ms, which was the maximum length of a single trial in Variable blocks. After the minimal inter-stimulus interval in Variable blocks (2500 ms), time series include a varying and decreasing number of observations until the maximum interval of 4500 ms. These data were used in several ways. First, we used LMM to revalidate the presence of tonic differences in pupil size also when inspecting single trials. We modelled the standardised pupil size as the dependant variable, over 2500 ms to include all the trials in both conditions. We included the Block Type as a fixed factor, and a maximal random-effects structure (Barr et al., 2013) that included intercepts for each participant, as well as by-participant slopes for the effect of Block Type.

Next, we aimed to identify in pupil dynamics based on hazard rate, as a source that drive anticipatory behaviour. We focused on the time series in Variable blocks, which included multiple interstimulus intervals. We used a linear regression to evaluate the slope of change in pupil size between 2000 ms after onset until 4500 ms, based on the mean pupil time-series we constructed for each participant. The data were then fitted and compared to a constant model.

*Data exclusion:* Before running statistical comparisons, we evaluated the number of usable trials for each participant. Usable trials were those in which there was a valid record of the pupil in at least one eye (left or right), and in which eyes were fixated at



the centre of the screen. As a default, we focused on analysing the data from the right eye. We identified five participants who had a substantial number of missing trials (50% and more), and they were excluded from the study prior to any further analysis. The final set of analyses included 25 participants.

## **Methods: Experiment 2**

To test for the reliability and generalisability of behavioural benefits and arousal modulation by temporal expectations in continuous performance tasks, we used a task that required discrimination of masked targets appearing either in a fixed rhythm or at variable intervals. The task parameters were designed to allow modelling of the behavioural benefits of predictability using the Theory of Visual Attention (TVA) (Bundesen, 1990). Previous TVA modelling in studies of temporal expectation using discrete trials has revealed performance benefits linked to increases in the parameter modelling Visual Processing Speed ( $v$ ) (Sørensen, Vangkilde, & Bundesen, 2015; Vangkilde, Petersen, & Bundesen, 2013; Signe Vangkilde, Coull, & Bundesen, 2012). We tested whether these findings extended to a continuous-performance context and then turned to our main question about whether tonic and phasic modulations of pupil size similarly accompanied effects of temporal expectation as in our first experiment.

### *Participants*

Participants in this experiment were 30 naïve volunteers (20 of whom were female, mean age 24.5,  $SD=4.18$ ). They were recruited through an online research-participation system at the University of Oxford. All had normal or corrected eyesight. Five were left-handed and the rest were right-handed (based on self-reports). They were compensated for their time (£10 per hour).

## *Apparatus*

A PC with an i7 processor and a 2-GB video card was used for displaying stimuli and recording behavioural data. The task was generated using Presentation software (Neurobehavioural Systems, Albany, CA). The stimuli were presented on a 24" LED monitor, with a screen resolution of 1080 X 1920 and a refresh rate of 100 Hz. All stimuli were preloaded to memory using the presentation software to guarantee minimal temporal noise. A video-based eye-tracker (EyeLink 1000, SR Research, Ontario, Canada) was used to measure pupil diameter as well as to monitor eye movements and blinks at 1000 Hz. The recorded data were saved to an eye-tracking PC.

## *Stimuli*

Participants in Experiment 2 performed a continuous task in which they had to make perceptual discriminations based on stimuli that briefly interrupted a mask at regular (3500 ms, Fixed condition) or variable (2500 – 4500 ms, Variable condition) intervals. In order to apply TVA to test the nature of benefits conferred by temporal expectation in this CPT, the task required a finer perceptual discrimination on stimuli that varied in duration across trials. Participants were asked to report the direction of arrow stimuli that occasionally interrupted a mask stimulus during extended task blocks (see Figure 3a for a schematic). The mask was a black stimulus comprising 16 bi-directional black arrows circumscribed in a black circle appearing at the centre of the screen (see Figure 3a). The total size of the mask was approximately 4.5° of visual angle horizontally and vertically. Following the presentation of the mask, a single target arrow pointing at one of eight possible directions (in a square occupying 4.5°) appeared for a varying duration (10/20/40/70/100 ms) and was immediately replaced by the mask. Participants were instructed to try to identify the target arrow and to indicate its direction using the arrow numpad, in which eight arrows pointing at different directions appeared at a corresponding location (see Figure 3a). Responses

were recorded during the successive inter-stimulus interval, during which the mask was presented.

The task consisted of 8 blocks with 100 trials and each lasting approximately 6 min. The blocks alternated between two conditions, which varied according to temporal expectation. On a Fixed block, a target appeared predictably every 3500 ms; on a Variable block, the target appeared unpredictably at intervals between 2500 ms and 4500 ms (mean 3500 ms) with an equal probability for each ISI (drawn from 20 possible intervals, equally spaced between 2500 ms and 4500 ms). Fixed and Variable blocks were always interleaved. Half the participants commenced with a Fixed block, and the other half with a Variable block.

We estimated how well participants identified 'targets' (arrow figures) that appeared at the centre of the screen every few seconds, and compared performance when the onset of the targets was temporally predictable vs. unpredictable using a computational model based on the theory of visual attention (Bundesen, 1990; Dyrholm, Kyllingsbæk, Espeseth, & Bundesen, 2011). We also compared simple accuracy measures for clearly visible targets (40, 70, and 100-ms exposure) between conditions.

### *Procedure*

The experiment was conducted in a dark testing room. Participants sat 50 cm from the monitor, and a chin rest was used to keep their head still. The eye-tracking device was placed near the monitor and was set to record the two eyes by default. The session began with a short procedure of calibrating the eye tracker. The task instructions then appeared on the screen and were explained to the participant by the experimenter. The participants were told that a visual mask would appear at the centre of the screen, to be replaced briefly every few seconds by a single arrow pointing in one of eight different directions, corresponding to the arrows on the numpad. They were also told that the arrow would be replaced immediately by a

visual mask. Whenever the mask appeared, they were to indicate the direction in which the target arrow pointed.

Participants were asked to be as accurate as possible and to keep their eyes fixed on the mask while responding. The analogous spatial organisation of the response mapping on the numpad made it possible to respond while maintaining fixation. It was also emphasised that the speed of responses was not important. Participants were told that if they did not perceive any arrow, they could simply skip the trial. However, they were encouraged to guess if they were 'fairly certain' of having identified the arrow, in line with instructions in previous TVA studies (Sørensen et al., 2015). At the end of each experimental block, participants received feedback indicating their accuracy level. Accuracy was calculated based only on the responses provided, ignoring skipped trials. Participants were asked to aim for 80%–90% accuracy and thus encouraged to guess less if their accuracy fell below 80% and to guess more if performance exceeded 90%.

Before beginning the experimental session, a short practice session with variable inter-stimulus intervals (2500 – 4500 ms) consisting of 20 trials allowed participants to learn the task. During the practice block, the first 10 trials presented the targets for an extended duration of 120 ms. The experimenter monitored the participants' responses at this stage to ensure they understood and followed instructions. The experiment itself consisted of eight blocks (each experimental block lasting approximately 6 minutes). Each block was followed by a short break (approximately one minute). In each block there were 100 trials. There were four Fixed blocks and four Variable blocks. In all, there were 800 experimental trials (400 for each condition) excluding practice.

## *Statistical Analysis*

*Behavioural data:* We tested whether temporal predictions influenced performance parameters in a continuous-performance task using TVA modelling parameters and simple accuracy measures.

For the modelling analysis, the data extraction and fitting procedures were performed using Matlab (Ver. 2019a; MathWorks, Inc., Natick, MA) and the LibTVA (Dyrholm et al., 2011; Kyllingsbæk, 2006). The behavioural dataset was first split according to experimental condition: Fixed (4 blocks) or Variable (4 blocks). The calculation of the theoretical attentional parameters (processing speed and perceptual threshold) was based on a maximum-likelihood fitting procedure introduced by Kyllingsbæk (2006) to model the observations based on the TVA framework, using the default modelling parameters (K model 'free'; exponential fitting). The fitting algorithm output includes two theoretical parameters: (1) Parameter  $t_0$  is the perceptual threshold, defined as the longest exposure duration that does not evoke conscious perception, measured in seconds; (2) Parameter  $v$  is the visual processing speed, or processing rate, measured in the number of target items processed per second. We then compared the resulting parameters between the two conditions.

For the analysis of the empirical data, we compared the accuracy rate between conditions for targets presented for 40, 70 and 100 ms. We focused on these exposure durations, as eight participants had missing valid responses in shorter durations. We used a Generalised Linear Mixed-Effect (GLME) model for this comparison, to compare target identification in two conditions (comparable to our contrast in Experiment 1) while also accounting for the additive effect of exposure duration on target detection. Thus, the model included the effects of Block Type (Variable vs. Fixed) and Exposure Duration (40, 70, and 100 ms) as fixed factors, and

a random-effects structure that included intercepts for each participant, as well as by-participant slopes for Block Type and Exposure Duration.

*Pupillometry data:* we repeated the same procedure as in Experiment 1.

*Data exclusion:* We applied the same criteria as in Experiment 1. Four participants had a substantial number of missing trials (50% and more) and were excluded prior to any further analysis. The final set of analyses included 26 participants.

## Acknowledgments

This work was supported by a Wellcome Trust Senior Investigator Award (104571/Z/14/Z) and a James S. McDonnell Foundation Understanding Human Cognition Collaborative Award (220020448) to A.C.N, and by the NIHR Oxford Health Biomedical Research Centre. The Wellcome Centre for Integrative Neuroimaging is supported by core funding from the Wellcome Trust (203139/Z/16/Z).

## Author Contributions

NS and ACN developed the study concept and had written the manuscript. NS programmed the experiment, collected, and analysed the data.

## Bibliography

- Angela, J. Y., & Dayan, P. (2005). Uncertainty, neuromodulation, and attention. *Neuron*, 46(4), 681–692.
- Aston-Jones, G., & Cohen, J. D. (2005). An integrative theory of locus coeruleus-norepinephrine function: Adaptive gain and optimal performance. *Annual Review of Neuroscience*, 28(1), 403–450.

<https://doi.org/10.1146/annurev.neuro.28.061604.135709>

- Barr, D. J., Levy, R., Scheepers, C., & Tily, H. J. (2013). Random effects structure for confirmatory hypothesis testing: Keep it maximal. *Journal of Memory and Language*, *68*(3), 255–278. <https://doi.org/10.1016/j.jml.2012.11.001>
- Bundesen, C. (1990). A theory of visual attention. *Psychological Review*, *97*(4), 523–547. <https://doi.org/10.1037/0033-295X.97.4.523>
- Capizzi, M., Correa, Á., Wojtowicz, A., & Rafal, R. D. (2015). Foreperiod priming in temporal preparation: Testing current models of sequential effects. *Cognition*, *134*, 39–49. <https://doi.org/10.1016/J.COGNITION.2014.09.002>
- Conners, C. K., & Staff, M. H. S. (2000). Conners' Continuous Performance Test II (CPT II V. 5). *North Tonawanda, NY: Multi-Health Systems Inc*, 1–16.
- Coull, J. T., & Nobre, A. C. (1998). Where and when to pay attention: the neural systems for directing attention to spatial locations and to time intervals as revealed by both PET and fMRI. *Journal of Neuroscience*, *18*(18), 7426–7435. <https://doi.org/10.1523/JNEUROSCI.1874-98.2000>
- Dankner, Y., Shalev, L., Carrasco, M., & Yuval-Greenberg, S. (2017). Prestimulus Inhibition of Saccades in Adults With and Without Attention-Deficit/Hyperactivity Disorder as an Index of Temporal Expectations. *Psychological Science*, *28*(7), 835–850. <https://doi.org/10.1177/0956797617694863>
- Davies, D. R., & Parasuraman, R. (1982). *The psychology of vigilance*. Academic Pr.
- Dayan, P., & Yu, A. J. (2006). Phasic norepinephrine: a neural interrupt signal for unexpected events. *Network: Computation in Neural Systems*, *17*(4), 335–350.
- Denison, R. N., Parker, J. A., & Carrasco, M. (2019). Modeling pupil responses to rapid sequential events. *BioRxiv*. <https://doi.org/10.1101/655902>
- Dyrholm, M., Kyllingsbæk, S., Espeseth, T., & Bundesen, C. (2011). Generalizing parametric models by introducing trial-by-trial parameter variability: The case of TVA. *Journal of Mathematical Psychology*, *55*(6), 416–429.
- Friedman, D., Hakerem, G., Sutton, S., & Fleiss, J. L. (1973). Effect of stimulus

uncertainty on the pupillary dilation response and the vertex evoked potential. *Electroencephalography and Clinical Neurophysiology*, 34(5), 475–484.  
[https://doi.org/10.1016/0013-4694\(73\)90065-5](https://doi.org/10.1016/0013-4694(73)90065-5)

Ghose, G. M., & Maunsell, J. H. R. (2002). Attentional modulation in visual cortex depends on task timing. *Nature*, 419(6907), 616–620.  
<https://doi.org/10.1038/nature01057>

Green, D. M., & Swets, J. A. (1966). Signal detection theory and psychophysics. In *Perceptual learning*. *Current Biol.*

Hautus, M. J. (1995). Corrections for extreme proportions and their biasing effects on estimated values of  $d'$ . *Behavior Research Methods, Instruments, & Computers*.  
<https://doi.org/10.3758/BF03203619>

Hebb, D. O. (1955). Drives and the CNS (conceptual nervous system). *Psychological Review*, 62(4), 243.

Janssen, P., & Shadlen, M. N. (2005). A representation of the hazard rate of elapsed time in macaque area LIP. *Nature Neuroscience*, 8(2), 234–241.  
<https://doi.org/10.1038/nn1386>

Jennings, J. R., Van Der Molen, M. W., & Steinhauer, S. R. (1998). Preparing the heart, eye, and brain: Foreperiod length effects in a nonaging paradigm. *Psychophysiology*, 35(1), 90–98. <https://doi.org/10.1017/S0048577298970081>

Jones, M. R. (2010). Attending to sound patterns and the role of entrainment. In A. C. Nobre & J. T. Coull (Eds.), *Attention and Time* (pp. 317–330). New York: Oxford University Press.

Kyllingsbæk, S. (2006). Modeling visual attention. *Behavior Research Methods*, 38(1), 123–133.

Lee, J., & Park, S. (2006). The role of stimulus salience in CPT-AX performance of schizophrenia patients. *Schizophrenia Research*, 81(2), 191–197.

Mackworth, J. F. (1968). Vigilance, Arousal, and Habituation. *Psychological Review*, 75(4), 308–322. <https://doi.org/10.1037/h0025896>



- Mathôt, S., Aarts, E., Verhage, M., Veenliet, J. V., Dolan, C. V., & van der Sluis, S. (2013). A simple way to reconstruct pupil size during eye blinks. *Figshare*. <https://doi.org/10.1038/nn.3648>
- Nobre, A.C., & Rohenkohl, G. (2014). Time for the fourth dimension in attention. In Anna Christina Nobre & S. Kastner (Eds.), *The Oxford handbook of attention* (pp. 676–721). Oxford, UK: Oxford University Press.
- Nobre, A.C., & Van Ede, F. (2018, December 7). Anticipated moments: Temporal structure in attention. *Nature Reviews Neuroscience*, Vol. 19, pp. 34–48. <https://doi.org/10.1038/nrn.2017.141>
- Rajkowski, J. (1993). Correlations between locus coeruleus (LC) neural activity, pupil diameter and behavior in monkey support a role of LC in attention. *Soc. Neurosc., Abstract, Washington, DC, 1993*.
- Robertson, I. H., Manly, T., Andrade, J., Baddeley, B. T., & Yiend, J. (1997). Oops!': performance correlates of everyday attentional failures in traumatic brain injured and normal subjects. *Neuropsychologia*, 35(6), 747–758.
- Robertson, I. H., & O'Connell, R. (2010). Vigilant attention. *Attention and Time*, 79–88.
- Sarter, M., Givens, B., & Bruno, J. P. (2001). The cognitive neuroscience of sustained attention: where top-down meets bottom-up. *Brain Research Reviews*, 35(2), 146–160.
- Shalev, N., Bauer, A. K. R., & Nobre, A. C. (2019). The tempos of performance. *Current Opinion in Psychology*. <https://doi.org/10.1016/j.copsyc.2019.06.003>
- Shalev, N., Humphreys, G., & Demeyere, N. (2016). Assessing the temporal aspects of attention and its correlates in aging and chronic stroke patients. *Neuropsychologia*, 92, 59–68. <https://doi.org/10.1016/J.NEUROPSYCHOLOGIA.2016.08.001>
- Shalev, N., Humphreys, G., & Demeyere, N. (2018). Manipulating perceptual parameters in a continuous performance task. *Behavior Research Methods*.

<https://doi.org/10.3758/s13428-017-0877-7>

- Shalev, N., Vangkilde, S., Neville, M. J., Tunbridge, E. M., Nobre, A. C., & Chechlacz, M. (2019). Dissociable Catecholaminergic Modulation of Visual Attention: Differential Effects of Catechol-O-Methyltransferase and Dopamine Beta-Hydroxylase Genes on Visual Attention. *Neuroscience*.  
<https://doi.org/10.1016/j.neuroscience.2019.05.068>
- Sørensen, T. A., Vangkilde, S., & Bundesen, C. (2015). Components of attention modulated by temporal expectation. *Journal of Experimental Psychology: Learning, Memory, and Cognition*, 41(1), 178–192.  
<https://doi.org/10.1037/a0037268>
- Steriade, M. (1996). Arousal: revisiting the reticular activating system. *Science*, 272(5259), 225.
- Vangkilde, S., Petersen, A., & Bundesen, C. (2013). Temporal expectancy in the context of a theory of visual attention. *Philosophical Transactions of the Royal Society of London. Series B, Biological Sciences*, 368(1628), 20130054.  
<https://doi.org/10.1098/rstb.2013.0054> [doi]
- Vangkilde, Signe, Coull, J. T., & Bundesen, C. (2012). Great expectations: temporal expectation modulates perceptual processing speed. *Journal of Experimental Psychology: Human Perception and Performance*, 38(5), 1183.
